1           **CADM2 is implicated in impulsive personality and numerous other traits by**  
2           **genome- and phenome-wide association studies in humans and mice**

3 Sandra Sanchez-Roige\*<sup>1,2</sup>, Mariela V Jennings<sup>1</sup>, Hayley H A Thorpe<sup>3</sup>, Jazlene E Mallari<sup>1</sup>, Lieke  
4 C van der Werf<sup>1</sup>, Sevim B Bianchi<sup>1</sup>, Calvin Lee<sup>1</sup>, Travis T Mallard<sup>4</sup>, Samuel A Barnes<sup>1</sup>, Jin Yi  
5 Wu<sup>1</sup>, Amanda M Barkley-Levenson<sup>1</sup>, Ely C Boussaty<sup>1</sup>, Cedric E Snethlage<sup>1</sup>, Danielle Schafer<sup>1</sup>,  
6 Zeljana Babic<sup>1</sup>, Boyer D Winters<sup>5</sup>, Katherine E Watters<sup>6,7</sup>, Thomas Biederer<sup>6</sup>, on behalf of the  
7 23andMe Research Team<sup>8</sup>, James Mackillop<sup>9</sup>, David N Stephens<sup>10</sup>, Sarah L Elson<sup>8</sup>, Pierre  
8 Fontanillas<sup>8</sup>, Jibrán Y Khokhar<sup>3,11</sup>, Jared W Young<sup>1</sup>, Abraham A Palmer\*<sup>1,12</sup>

9

10           <sup>1</sup>Department of Psychiatry, University of California San Diego, San Diego, CA, USA.

11           <sup>2</sup>Department of Medicine, Vanderbilt University Medical Center, Nashville, Tennessee, USA.

12           <sup>3</sup>Department of Biomedical Sciences, Ontario Veterinary College, University of Guelph, Ontario,

13 Canada. <sup>4</sup>Psychiatric and Neurodevelopmental Genetics Unit, Center for Genomic Medicine,

14 Massachusetts General Hospital, Boston, MA, 02114, USA. <sup>5</sup>Department of Psychology,

15 University of Guelph, Guelph, ON, Canada. <sup>6</sup>Department of Neuroscience, Tufts University

16 School of Medicine, Boston, MA, USA. <sup>7</sup>Department of Neurology, Yale School of Medicine,

17 New Haven, CT, USA. <sup>8</sup>23andMe, Inc., Sunnyvale, CA, USA. <sup>9</sup>Peter Boris Centre for Addictions

18 Research, McMaster University and St. Joseph's Healthcare Hamilton, Hamilton, ON, Canada

19 and Homewood Research Institute, Guelph, ON, Canada. <sup>10</sup>Laboratory of Behavioural and

20 Clinical Neuroscience, School of Psychology, University of Sussex, Brighton, UK. <sup>11</sup>Schulich

21 School of Medicine and Dentistry, Western University, London, ON. <sup>12</sup>Institute for Genomic

22 Medicine, University of California San Diego, San Diego, CA, USA.

23

24 **\*Co-corresponding Authors:** Sandra Sanchez-Roige, [sanchezroige@ucsd.edu](mailto:sanchezroige@ucsd.edu), Abraham A.

25 Palmer, [aap@ucsd.edu](mailto:aap@ucsd.edu)

26 **Keywords:** Cadm2, UPPS-P, BIS, impulsivity, GWAS, PheWAS, animal models, cross-species

27 translation

28 **ABSTRACT**

29 Impulsivity is a multidimensional heritable phenotype that broadly refers to the tendency to act  
30 prematurely and is associated with multiple forms of psychopathology, including substance use  
31 disorders. We performed genome-wide association studies (**GWAS**) of eight impulsive  
32 personality traits from the Barratt Impulsiveness Scale and the short UPPS-P Impulsive  
33 Personality Scale (N=123,509-133,517 23andMe research participants of European ancestry),  
34 and a measure of Drug Experimentation (N=130,684). Because these GWAS implicated the  
35 gene *CADM2*, we next performed single-SNP phenome-wide studies (**PheWAS**) of several of  
36 the implicated variants in *CADM2* in a multi-ancestral 23andMe cohort (N=3,229,317, European;  
37 N=579,623, Latin American; N=199,663, African American). Finally, we produced *Cadm2*  
38 mutant mice and used them to perform a Mouse-PheWAS (“MouseWAS”) by testing them with a  
39 battery of relevant behavioral tasks. In humans, impulsive personality traits showed modest  
40 chip-heritability (~6-11%), and moderate genetic correlations ( $r_g=.20-.50$ ) with other personality  
41 traits, and various psychiatric and medical traits. We identified significant associations proximal  
42 to genes such as *TCF4* and *PTPRF*, and also identified nominal associations proximal to *DRD2*  
43 and *CRHR1*. PheWAS for *CADM2* variants identified associations with 378 traits in European  
44 participants, and 47 traits in Latin American participants, replicating associations with risky  
45 behaviors, cognition and BMI, and revealing novel associations including allergies, anxiety,  
46 irritable bowel syndrome, and migraine. Our MouseWAS recapitulated some of the associations  
47 found in humans, including impulsivity, cognition, and BMI. Our results further delineate the role  
48 of *CADM2* in impulsivity and numerous other psychiatric and somatic traits across ancestries  
49 and species.

50

## 51 INTRODUCTION

52 Impulsivity is a multifaceted psychological construct that has been broadly defined as  
53 thoughts or actions that are “poorly conceived, prematurely expressed, unduly risky or  
54 inappropriate to the situation, and that often result in undesirable consequences” [1]. Impulsivity  
55 has been repeatedly associated with numerous psychiatric diseases, including ADHD and  
56 substance use disorders [2, 3]. We previously performed genome-wide association studies  
57 (**GWAS**) of impulsive personality traits (n=21,806-22,861) using two of the most widely used  
58 impulsivity questionnaires, the Barratt Impulsiveness Scale (**BIS-11**; 3 traits) and the Impulsive  
59 Personality Scale (**UPPS-P**; 5 traits), as well as a measure of Drug Experimentation [4]. These  
60 traits were partially genetically correlated, suggesting that each impulsivity domain is governed  
61 by overlapping but distinct biological mechanisms [4, 5]. Our work also identified significant  
62 genetic correlations between impulsivity and numerous psychiatric and substance use traits, in  
63 line with the NIMH Research Domain Criteria (**RDoC**), proposing impulsivity as a  
64 transdiagnostic endophenotype for psychopathology [6].

65 The cell adhesion molecule 2 (*CADM2*) gene, which was the most robustly implicated  
66 gene in our prior GWAS of impulsivity [4], has also been extensively implicated in other risky  
67 and substance use behaviors [7]. *CADM2* mediates synaptic plasticity and is enriched in the  
68 frontal cortex and striatum, which are regions that regulate reward and inhibitory processes. We  
69 and others have implicated this gene in traits that may underlie disinhibition in humans,  
70 supporting the observed genetic correlations between impulsivity and personality [8],  
71 educational attainment [9], cognition [10], risk-taking [11], substance use [4, 10, 12–15],  
72 externalizing psychopathology [16], neurodevelopmental disorders [17, 18], physical activity  
73 [19], reproductive health [20, 21], metabolic traits [22], and BMI [23], among others (see GWAS  
74 Catalog [www.ebi.ac.uk/gwas/](http://www.ebi.ac.uk/gwas/)). *Cadm2* knockout mice have previously been assessed for body  
75 weight and energy homeostasis [24] but have never been behaviorally characterized for  
76 measures of impulsivity or related behaviors.

77 Here, we took three approaches to elucidate genetic factors related to impulsivity. First,  
78 we collaborated with 23andMe, Inc., to extend upon our earlier GWAS of impulsivity [4] by  
79 increasing our sample size approximately 6-fold (n=123,509-133,517). Second, we performed  
80 single-SNP phenome-wide studies (**PheWAS**) of the 5 single nucleotide polymorphisms (**SNPs**)  
81 in and around *CADM2* that have been most strongly implicated by the current and prior GWAS.  
82 PheWAS were conducted in three ancestral groups (N=3,229,317, European; N=579,623, Latin  
83 American; N=199,663, African American) from the 23andMe research cohort, examining close

84 to 1,300 traits, most with no published GWAS. Finally, we performed a mouse-PheWAS  
85 (“MouseWAS”) by creating and phenotyping mice harboring a *Cadm2* mutant allele in a broad  
86 battery of behavioral tasks that included analogous human measures of risk-taking and  
87 impulsivity, substance use, cognition and BMI.

## 88 MATERIALS AND METHODS

### 89 *Human Studies*

#### 90 **GWAS cohort and phenotypes**

91 We analyzed data from a cohort of up to 133,517 male and female research participants  
92 of European ancestry, a subset of which were analyzed in our prior publications [4, 13, 13, 25,  
93 26]. All participants were drawn from the research participant base of 23andMe, Inc., a direct-to-  
94 consumer genetics company, and were not compensated for their participation. Participants  
95 provided informed consent and participated in the research online, under a protocol approved  
96 by the external AAHRPP-accredited IRB, Ethical & Independent Review Services  
97 ([www.eandireview.com](http://www.eandireview.com)). During 4 months in 2015 and 14 months from 2018-2020, participants  
98 responded to a survey that included up to 139 questions pertaining to aspects of impulsivity and  
99 substance use and misuse. To measure impulsive personality, we used five subscales from the  
100 UPPS-P ([27, 28]; a 20-item that measures (lack of) Premeditation, (lack of) Perseverance,  
101 Positive Urgency, Negative Urgency, and Sensation Seeking; **Table S1**). We also administered  
102 the BIS-11 ([29]; a 30-item questionnaire that measures Attentional, Motor, and Nonplanning  
103 impulsiveness; **Table S1**). Lastly, we measured Drug Experimentation, defined as the number  
104 of substances an individual has used (adapted from the PhenX toolkit [30]; **Table S1**). We  
105 scored UPPS-P, BIS-11 and Drug Experimentation as previously described [4]. We used  
106 quantile normalization, since some scores were not normally distributed (**Figures S1-3**). Only  
107 individuals identified as European ancestry based on empirical genotype data [31] were  
108 included in this study. Basic demographic information about this sample is presented in **Table**  
109 **S2**. We used Pearson correlation coefficients ( $r$ ) to measure the phenotypic relationships  
110 between impulsivity subscales and demographics.

#### 111 **Genome-wide association and secondary analyses**

112 DNA extraction and genotyping were performed on saliva samples by CLIA-certified and  
113 CAP-accredited clinical laboratories of Laboratory Corporation of America. Quality control,  
114 imputation, and genome-wide analyses were performed by 23andMe (**Table S3**; [32, 33]).  
115 23andMe's analysis pipeline performs linear regression assuming an additive model for allelic  
116 effects (**Supplementary Material**). Covariates included age (inverse-normal transformed), sex,  
117 the top five principal genotype components, and indicator variables for genotyping platforms.  $p$ -  
118 values were corrected for genomic control. We examined genotype\*sex interactions for

119 suggestive loci. In addition, for the top loci, we examined African American and Latin American  
120 23andMe research participants who had responded to the same survey.

121 We used the FUMA web-based platform (version 1.3.6a) and MAGMA v1.08 [34, 35] to  
122 explore the functional consequences of the GWAS loci and to conduct gene-based analyses.

123 We used LDSC [36] to calculate genetic correlations ( $r_g$ ) between UPPS-P, BIS and  
124 Drug Experimentation, and 96 selected traits informed by prior literature.

### 125 **Phenome-wide association scan (PheWAS) in 23andMe**

126 We performed single-SNP PheWAS for 5 *CADM2* SNPs (rs993137, rs62263923,  
127 rs11708632, rs818219, rs6803322) using up to 1,291 well-curated self-reported phenotypes  
128 from a separate cohort of 23andMe research participants of European ( $N \leq 3,229,317$ ), Latin  
129 American ( $N \leq 579,623$ ) and African American ( $N \leq 199,663$ ) ancestries. We excluded traits with  
130  $< 1,000$  responses, based on a prior simulation study for PheWAS power analysis [37]. Ancestry  
131 was determined by analyzing local ancestry ([31] **Supplementary Material**). The variants were  
132 selected based on our GWAS results and previous literature (**Table S4**, and **Supplementary**  
133 **Material**). Genotyped and imputed variant statistics in PheWAS are shown in **Table S5**.

134 An overview of the data collection process has been previously described [38]. All  
135 regression analyses were performed using R version 3.2.2. We assumed additive allelic effects  
136 and included covariates for age (as determined by participant date of birth), sex, and the top five  
137 ancestry-specific principal components. We used a 5% FDR correction for multiple testing.

138 *MouseWAS*

### 139 **Subjects, behavioral characterization, and statistical analyses**

140 Our *Cadm2* mutant mice were produced at the University of California San Diego,  
141 Moores Cancer Center, Transgenic Mouse Core. We used the JM8.N4 cryosperm line  
142 (CSD70565 KOMP), which carries a floxed null allele in the *Cadm2* gene (**Figure S30**), on a  
143 C57BL/6N background. We crossed the floxed null allele line with a constitutive CRE driver line  
144 (Stock# 014094; The Jackson Laboratory), yielding a global constitutive null allele. We used a  
145 heterozygous x heterozygous (**HET**) breeding scheme, which produced homozygous (**HOM**)  
146 mutant *Cadm2* mice and their HET and wildtype (**WT**) littermates. Mice were genotyped using  
147 allele-specific polymerase chain reaction on ear notch tissue followed by gel electrophoresis  
148 [39]. *CADM2* protein expression levels were quantified by western blotting (**Figure S31**).

149           Five separate cohorts of male and female mice were used for these studies. See  
150 **Supplementary Material** for a more detailed description of the tasks and analyses of main  
151 variables. Procedures were approved by the University of California San Diego Institutional  
152 Animal Care and Use Committee. The UCSD animal facility meets all federal and state  
153 requirements for animal care and was approved by the American Association for Accreditation  
154 of Laboratory Animal Care. Procedures from cohort 2 were conducted in accordance with the  
155 Canadian Council on Animal Care and were approved by the University of Guelph Institutional  
156 Animal Care and Use Committee.

157

## 158 RESULTS

### 159 Genome-wide association analyses and secondary analyses

160 Self-reported impulsivity and Drug Experimentation scores are shown in **Table S6**. We  
161 found that ~6-11% of the phenotypic variation of these traits can be explained by common  
162 variants (**Table S7**). We identified 21 genome-wide significant associations ( $p < 5.0E-08$ ) for  
163 UPPS-P (5 traits), BIS (3 traits), and Drug Experimentation (**Figure 1**; **Figures S4-21**; **Table**  
164 **S8**). Although we tested 9 traits, in keeping with the standards of the field, we did not adjust the  
165 significance threshold. We also detected several nominal associations ( $p < 1.0E-06$ , **Table S8**);  
166 we discuss some of them in the **Supplementary Material**.

#### 167 GWAS of UPPS-P

168 *Premeditation*. We detected one significant hit (rs2958162,  $p = 2.50E-10$ ), located on  
169 chromosome 18 in the *TCF4* gene, which encodes a helix-loop-helix transcription factor and is  
170 widely expressed throughout the body and during development. Polymorphisms in *TCF4* have  
171 been associated with risk-taking and adventurousness [15], alcohol consumption [40],  
172 schizophrenia [41], depression [42, 43], and neuroticism [44, 45] (**Table S9**); *TCF4* is also a  
173 non-GWAS candidate gene for other psychiatric and neurological conditions [46].

174 *Perseverance*. We detected one significant association (rs5943997,  $p = 1.50E-8$ ) in the  
175 *POLA1* gene on the X chromosome. *POLA1* has been related to blood traits [46] and  
176 neurodevelopmental disorders [47], but its association with impulsivity is novel.

177 *Positive Urgency*. We identified one significant hit (rs143987963,  $p = 4.30E-08$ ) on  
178 chromosome 12, near the genes *MDM1* and *RAP1B*; however, inspection of the locus zoom plot  
179 (**Figure S9**) does not support a robust association.

180 *Negative Urgency*. We detected three significant hits: rs4840542 ( $p = 1.60E-09$ ), on  
181 chromosome 8, in the *XKR6* gene; rs5008475 ( $p = 4.90E-09$ ), on chromosome 5, near  
182 *TMEM161B* and *MEF2C*; and rs7829975, on chromosome 8, near *SGK223* and *CLDN23*  
183 ( $p = 5.00E-09$ ). Variants in strong LD with rs4840542 and rs7829975 are highly pleiotropic, and  
184 have been previously associated with several traits (**Table S9**), including body mass index  
185 (**BMI**) [48, 49], neuroticism [50, 51], depression [52], blood pressure, and alcohol consumption  
186 [53]. *XKR6* was also implicated in a recent GWAS of externalizing [16], and a GWAS of anxiety  
187 and depression [52].



188           *Sensation Seeking*. We detected 5 significant associations. First, we again observed a  
189 previously reported [4] association with a SNP near *CADM2* (rs11288859,  $p=2.10E-09$ ) on  
190 chromosome 3. We also detected an association with a SNP in *TCF4* (rs2958178,  $p=3.80E-12$ ).  
191 We identified a significant hit in *CACNA2D1* (rs38547,  $p=2.10E-08$ ) on chromosome 18.  
192 *CACNA2D1* has been previously associated with feeling nervous [50], and levels of sex  
193 hormone-binding globulin [54]. Furthermore, we found a significant association (rs1605379,  
194  $p=3.80E-08$ ) on chromosome 16, near *CYLD* and *SALL1*. SNPs in strong LD with rs1605379  
195 have been previously identified for risk-taking, adventurousness, and smoking initiation (**Table**  
196 **S9**). Lastly, we found a significant association (rs12600879,  $p=4.10E-08$ ) on chromosome 17,  
197 near *TBX21* and *OSBPL7*. Variants in strong LD with rs12600879 have been associated with  
198 BMI [55], but the finding in relation to impulsivity is novel.

#### 199 *GWAS of BIS-11*

200           *Attentional*. We identified one significant association (rs10196237,  $p=1.10E-08$ ) on  
201 chromosome 2, near the genes *SPHKAP* and *PID1*. *SPHKAP* has been previously associated  
202 with educational attainment [9], but the association with impulsivity is novel.

203           *Motor*. We detected one significant association near *CADM2* (rs35614735,  $p=3.20E-11$ ).  
204 We also identified an association (rs111502401,  $p=2.00E-08$ ), on chromosome 19, near the  
205 genes *ZNF229* and *ZNF180*; however, inspection of the regional association is not supportive of  
206 a strong association (**Figure S17**).

207           *Nonplanning*. We detected 2 variants: rs35614735 ( $p=4.70E-12$ ) near *CADM2*, which  
208 was the same SNP identified for Motor impulsivity; and rs6872863 ( $p=1.20E-08$ ) in the gene  
209 *ELOVL7* on chromosome 5. Variants in strong LD with rs6872863 have been reported for a  
210 variety of traits including educational attainment, mathematical ability [9], household income  
211 [56], and brain morphology, such as cortical surface area [57] (**Table S9**). However, there is  
212 extensive LD in this region, making the association difficult to interpret.

#### 213 *GWAS of Drug Experimentation*

214           We previously reported [4] a suggestive association (rs2163971,  $p=3.00E-07$ ) near the  
215 *CADM2* gene. In the present study, we identified a nearby SNP that was genome-wide  
216 significant (rs35614735,  $p=2.80E-15$ ). We also report 4 novel hits (rs951740,  $p=9.70E-10$ ,  
217 *PTPRF* on chromosome 1; rs12713405,  $p=9.70E-09$ , *BLC11A* on chromosome 2; rs67660520,

218  $p=7.60E-09$ , *CADPS2* on chromosome 7; rs7128648,  $p=2.50E-09$ , *NCAM1* on chromosome  
219 11). Intriguingly, *PTPRF* has been recently associated with problematic prescription opioid use  
220 [25] and opioid use disorder [58], as well as smoking initiation/cessation [59], cognition [60], and  
221 educational attainment [9] (**Table S9**). Variants in strong LD with rs67660520 have been  
222 associated with ADHD [61], smoking initiation [59], number of sexual partners [15] and BMI [49]  
223 (**Table S9**). *NCAM1* variants have been previously associated with alcohol, cannabis and  
224 smoking behaviors [59, 63], mathematical ability [9], and anxiety and depression [52], among  
225 other traits.

## 226 *Gene-based analyses*

227 Similar to the GWAS results, gene-based analyses using MAGMA identified an  
228 association (Bonferroni  $p<2.53E-06$ ; **Table S10**) between *CADM2* and 6 of the 9 traits  
229 examined in this paper: Premeditation, Sensation Seeking (UPPS-P); Attentional, Motor and  
230 Nonplanning (BIS-11); and Drug Experimentation. *TCF4*, which was significantly associated  
231 with Premeditation and Sensation Seeking in the GWAS, was significantly associated with these  
232 traits in the gene-based analysis. *MAPT*, which has been previously associated with many traits  
233 including multiple alcohol-related behaviors [13], was implicated in Negative Urgency. Lastly,  
234 *KDM4A*, which was recently related to problematic opioid use and interacts with selective  
235 serotonin reuptake inhibitors and dopaminergic agents [25], was significantly associated with  
236 Drug Experimentation.

## 237 *Phenotypic and genetic correlations*

238 A phenotypic and genetic correlation matrix of all 9 traits is shown in **Figure S22** and  
239 **Tables S11-12**. Consistent with the literature and our prior work [4, 5, 64, 65], both phenotypic  
240 and genetic inter-correlations among the UPPS-P and BIS subscales were high and positive,  
241 with the exception of Sensation Seeking and Perseverance, suggesting that these traits may  
242 represent relatively different constructs [5, 13, 64]. Drug experimentation was positively and  
243 significantly associated with all impulsive personality traits.

244 All impulsivity traits were phenotypically associated ( $r=-0.34-0.11$ ) with demographic  
245 variables (**Table S12**), impulsivity scores being greater in male and younger research  
246 participants, compared to female and older participants; and in participants with higher BMI,  
247 lower household income, and fewer years of education, as we previously reported [13].

248 **Figure 2** shows a genetic correlation matrix of BIS, UPPS-P, Drug Experimentation and  
249 several other phenotypes (full results in **Table S13**). As anticipated, we found positive moderate  
250 to high genetic correlations ( $r_g=0.25-0.79$ ) between virtually all UPPS-P (except Perseverance  
251 and Sensation Seeking) and BIS subscales, and Drug Experimentation, and substance use  
252 disorders **Table S13**).

253 We also observed moderate to strong associations between all impulsive subscales  
254 (except UPPS-P Perseverance) and other personality traits, such as risk-taking ( $r_g=0.15-0.65$ ),  
255 neuroticism ( $r_g=-0.23-0.84$ ), and loneliness ( $r_g=0.17-0.54$ ), particularly for Positive and Negative  
256 Urgency. Extraversion was positively associated with Sensation Seeking ( $r_g=0.34$ ). Externalizing  
257 psychopathology, which represents disorders and behaviors characterized by deficits in  
258 inhibition, was strongly associated with all impulsivity facets ( $r_g=0.28-0.92$ ), except  
259 Perseverance.

260 We also identified positive associations with an array of psychiatric phenotypes,  
261 including ADHD ( $r_g=0.20-0.47$ ), depression ( $r_g=-0.13-0.47$ ) and anxiety ( $r_g=-0.38-0.61$ )  
262 disorders, and cross-disorder ( $r_g=0.12-0.44$ ). The associations were again primarily significant  
263 for all except Perseverance and Sensation Seeking. Other disorders showed weaker  
264 associations (e.g., schizophrenia,  $r_g=-0.09-0.15$ ) or were only significantly associated with one  
265 impulsivity facet [e.g., anorexia nervosa (Perseverance,  $r_g=-0.16$ ); bipolar disorder (Motor,  
266  $r_g=0.22$ )].

267 Most impulsivity subscales were genetically correlated with lower socioeconomic  
268 variables [e.g., educational attainment ( $r_g=-0.49$  to  $-0.16$ ), income ( $r_g=-0.38$  to  $-0.16$ ), Townsend  
269 index ( $r_g=0.18-0.58$ )].

270 Metabolic and medical phenotypes, such as BMI ( $r_g=0.18-0.28$ ), chronic pain ( $r_g=0.22-$   
271  $0.46$ ), insomnia ( $r_g=0.20-0.42$ ), and coronary artery disease ( $r_g=0.18-0.30$ ), were genetically  
272 correlated with all impulsive subscales (except Perseverance and Sensation Seeking). We also  
273 noted negative genetic associations with parental longevity ( $r_g=-0.17$  to  $-0.32$ ).

## 274 **PheWAS**

275 To explore the impact of specific variants in and around *CADM2*, we performed single-  
276 SNP PheWAS using 5 of the most implicated SNPs, independently, against 1,291 traits (**Figure**  
277 **3**). The list of PheWAS association results using the 23andMe cohort after 5% FDR correction is

278 available in **Tables S14** (summary), **S15** (Europeans), **S16** (Latin American) and **S17** (African  
279 Americans).

280 In European cohorts, *CADM2* variants had been previously identified to be significantly  
281 associated with numerous traits (**Table S18**). Most SNPs were highly correlated ( $R^2 > 0.1$ ) and  
282 tagged similar traits (**Figure S23**), but the overlap was incomplete (**Figure S24** and **Table S19**).  
283 rs993137, located at 85,449,885 bp on chromosome 3, showed the highest number of  
284 associations (378), which we describe below.

285 We replicated all previously known associations in 23andMe participants of European  
286 ancestry, identifying signals across all categories tested (**Table S15**). These included negative  
287 associations with risky behavior (e.g., lower risk for adventurousness [ $\beta = -0.05$ ,  $p = 1.33E-08$ ],  
288 risk-taking tendencies [ $\beta = -0.02$ ,  $p = 1.13E-07$ ]) and substance use behaviors (e.g., lower risk for  
289 alcohol consumption [ $\beta = -0.03$ ,  $p = 2.05E-09$ ] and tobacco initiation ( $\beta = -0.02$ ,  $p = 3.66E-12$ ; but see  
290 packs per day,  $\beta = 0.01$ ,  $p = 1.05E-03$ ), as well as negative associations with psychiatric disorders  
291 characterized by deficits in impulsivity, such as lower risk for ADHD ( $\beta = -0.05$ ,  $p = 2.17E-41$ ).  
292 Furthermore, we found positive associations with educational outcomes (e.g., higher  
293 educational attainment ( $\beta = 0.03$ ,  $p = 1.67E-12$ ). Novel findings included positive associations with  
294 allergies ( $\beta = 0.04$ ,  $p = 4.51E-03$ ), anxiety (e.g., panic [ $\beta = 0.02$ ,  $p = 6.82E-08$ ]), and medical  
295 conditions (e.g., IBS [ $\beta = 0.02$ ,  $p = 8.89E-07$ ]), anemia ( $\beta = 0.01$ ,  $p = 8.30E-74$ ), hepatitis C ( $\beta = -0.06$ ,  
296  $p = 8.36E-10$ ). Intriguingly, we also detected positive associations with pain phenotypes ( $\beta = 0.02$ ,  
297  $p = 8.37E-12$ ) and a need for a higher dose of pain medication ( $\beta = 0.01$ ,  $p = 1.02E-06$ ).

298 For the overlapping phenotypes, UK Biobank PheWAS results [66] largely supported the  
299 23andMe PheWAS findings (except for smoking behaviors). For example, we identified  
300 associations with dietary traits (e.g., daily fruit and vegetable intake ( $\beta = -0.01$ ,  $p = 4.23E-11$ ),  
301 pastry frequency ( $\beta = 0.01$ ,  $p = 7.36E-06$ ), sleep quality ( $\beta = -0.01$ ,  $p = 2.53E-03$ ), and number of  
302 pregnancies ( $\beta = -0.01$ ,  $p = 7.69E-04$ ), among others (**Table S15**, [12]).

303 For the PheWAS of the Latin American cohort, 47 traits were significantly associated  
304 with *CADM2* variants (**Table S16**). The highest number of associations were again observed for  
305 rs993137 [67], which are described below. Similarly, although some of the SNPs were  
306 correlated ( $R^2 > 0.1$ ; **Figure S24**), the overlap was incomplete (**Figure S26**, **Table S20**). The  
307 pattern of associations was consistent with those described in the European cohort. The  
308 strongest associations were with risky behaviors, such as adventurousness ( $\beta = -0.04$ ,  $p = 1.76E-$

309 17), risk-taking ( $\beta=-0.02$ ,  $p=5.90E-07$ ), alcohol consumption ( $\beta=-0.03$ ,  $p=1.41E-12$ ), and  
310 disorders characterized by high levels of impulsivity, such as ADHD ( $\beta=-0.04$ ,  $p=4.74E-10$ ). The  
311 novel findings were, again, with multiple forms of allergies (e.g., seasonal allergies,  $\beta=0.03$ ,  
312  $p=3.0E-04$ ), migraine ( $\beta=0.04$ ,  $p=1.56E-04$ ), sleep behaviors (e.g., sleep apnea,  $\beta=-0.03$ ,  
313  $p=6.76E-04$ ), among others.

314 All findings that were in common between the European and Latin American cohorts  
315 showed the same direction of effect and similar effect sizes. We did not identify FDR-significant  
316 associations in the African American cohort (**Table S17**). The effect sizes were generally  
317 extremely small (**Figures S27-28**), as is expected for a single gene and complex traits.

## 318 **MouseWAS**

319 **Figure 4** summarizes the MouseWAS results across the five cohorts tested. Full  
320 statistics and additional secondary measures are described in the **Supplementary Material** and  
321 **Table S20**.

322 *Cohort 1 - Motivation, inhibition, and risk-taking behavior.* No differences in motivation  
323 were found between WT and HET mice during the Progressive Breakpoint task [ $F_{(1,51)}=0.003$ ,  
324  $p=9.57E-01$ ; **Figure 4A**]. However, we noted significant genotype differences in behavioral  
325 flexibility in the Probabilistic Reversal Learning (**PRL**) task, as indexed by the number of trials to  
326 first reversal [ $F_{(1,42)}=4.27$ ,  $p=4.50E-02$ ; **Figure 4B**], and risky behavior in the mouse Iowa  
327 Gambling Task (**IGT**;  $F_{(1,51)}=4.70$ ,  $p=3.50E-02$ ; **Figure 4C**], HET mice requiring fewer trials to  
328 reach criterion and choosing risky options less frequently than WT mice ( $p<0.05$ ), respectively.  
329 The number of premature responses, on the contrary, were higher in HET mice [ $F_{(1,51)}=5.78$ ,  
330  $p=2.00E-02$ ] compared to WT mice ( $p<0.05$ ; **Figure 4D**). In the Behavioral pattern monitor  
331 (**BPM**), HET mice exhibited greater exploratory behavior, as shown by an increase in hole-  
332 pokes [ $F_{(1,53)}=4.88$ ,  $p=3.20E-02$ ; **Figure 4E**], compared to WT mice ( $p<0.05$ ), but general levels  
333 of activity, such as distance traveled ( $F_{(1,53)}=0.42$ ,  $p=5.21E-01$ ; **Figure 4F**), were similar across  
334 the genotypes. Lastly, although the startle response was equal across the groups (**Figure 4G**),  
335 prepulse inhibition (**PPI**) was larger in HET mice compared to WT mice ( $p<0.05$ ; **Figure 4H**),  
336 particularly at ISI 25 and 100 in HET mice [ $F_{(1,53)}=8.23$ ,  $p=6.00E-03$ ,  $F_{(1,53)}=4.50$ ,  $p=3.90E-02$ ,  
337 respectively].

338 *Cohort 2 - Motoric impulsivity.* The main outcome tested in cohort 2 were premature  
339 responses via the 5-choice serial reaction time task (**5CSRTT**; **Figure 4J-M**). Premature

340 responses were lower in HOM ( $p < 0.001$ ) and WT ( $p < 0.02$ ) mice compared to HET mice under  
341 standard conditions ( $F_{(2,36)} = 8.74$ ,  $p = 8.06E-04$ ; **Figure 4J**), and compared to both HET ( $p < 0.001$ )  
342 and WT ( $p < 0.01$ ) mice during a long ITI session ( $H_{(2)} = 16.10$ ,  $p = 3.19E-04$ ; **Figure 4L**). HOM  
343 mice were faster at learning the 5CSRTT, requiring fewer days for adequate baseline  
344 performance ( $F_{(2,36)} = 7.42$ ,  $p = 2.00E-03$ ; **Figure 4I**), compared to WT mice ( $p < 0.01$ ).

345 *Cohort 3 - General locomotion, anxiety-like behavior, and ethanol consumption.* We  
346 found a significant effect of genotype on the distance traveled in the Open Field [**OF**;  
347  $F_{(2,70)} = 7.525$ ,  $p = 1.00E-03$ ; **Figure 4N**], HOM mice showing higher levels of locomotor activity  
348 than WT mice ( $p = 1.40E-02$ ). No differences in anxiety-like behavior were detected across WT,  
349 HET or HOM mice in the Elevated Plus Maze (**EPM**) or Light-Dark Box (**LDB**) tests (**Figure 4O-**  
350 **P**, **Table S20**). The total amount of ethanol consumed during the drinking-in-the-dark (**DID**)  
351 paradigm did not differ between the groups ( $[F_{(2,78)} = 1.084$ ,  $p = 3.44E-01$ ]; **Figure 4Q**).

352 *Cohort 4 - Body weight.* Relative to WT mice, there was a significant reduction in body  
353 weight in HOM mice from week 21 onwards ( $\beta = -3.74 \pm 1.27$ ,  $p = 4.00E-03$ ; **Figure 4R**).

354 *Cohort 5 - Dendrite morphology.* Quantitative analyses of MSN in the NAc revealed no  
355 difference in dendritic spine density across the groups (**Figure 5S**).



## 356 DISCUSSION

357 In this study, we performed the largest GWAS of impulsive personality traits to date, we  
358 conducted the first multi-ancestral PheWAS exploring the role of *CADM2* on a diverse array of  
359 traits, and we performed a corresponding MouseWAS using *Cadm2* mutant mice to assess its  
360 role in impulsivity and other relevant behaviors. We extend on prior findings [4, 5] showing that  
361 the genetic architecture of impulsivity facets only partially overlap, providing further support to  
362 the idea of impulsivity being a multifaceted construct even at the genetic level. We identified  
363 positive genetic correlations across multiple domains, particularly substance use disorders,  
364 confirming that NIMH RDoC transdiagnostic domains [6], or endophenotypes, such as impulsive  
365 personality traits, can be used to dissect the genetic basis of psychiatric illness and normal  
366 functioning. RDoC or transdiagnostic traits are beneficial because they enable translational  
367 research and provide a more granular biological understanding of psychiatric disorders. Using  
368 mouse and human correlates, we provide further evidence that *CADM2* is a robust candidate  
369 gene for impulsivity and an important modulator of numerous other psychiatric and somatic  
370 traits.

371 We increased the sample size of our prior GWAS of impulsivity by almost 6-fold and  
372 identified 21 genome-wide significant loci implicated in impulsive personality and Drug  
373 Experimentation. For instance, SNPs located in the gene *TCF4* were implicated in 3 subscales;  
374 this gene is also highly pleiotropic for other psychiatric conditions. Furthermore, we identified  
375 associations with *NCAM1*, which, intriguingly, is a critical member of the NTAD (*NCAM1*-  
376 *TTC12-ANKK1-DRD2*) gene cluster [68] and variants correlated with *NCAM1* in that cluster  
377 have been associated with differences in D2 receptor density [69]. We also detected  
378 associations near *XKR6* and *AFF3*, which have been recently implicated in externalizing  
379 psychopathology [16], and *PTPRF* and *KDM4A*, recently implicated in problematic opioid use  
380 [25] and opioid use disorder [58]. Although in this report we focused on *CADM2*, functional  
381 studies of those genes are also warranted. Furthermore, we found nominal evidence for  
382 candidate gene studies implicating monoamine neurotransmitters in impulsivity and Drug  
383 Experimentation (*DRD2*, *HTR3B*). High impulsivity depends on a neural network that includes  
384 the ventral striatum (subsuming the NAc) with top-down control from prefrontal cortical regions,  
385 and is modulated by monoamine neurotransmitters including dopamine and serotonin [70]; this  
386 is the first GWAS to implicate genes modulating these systems as robust candidate genes for  
387 impulsivity.

388           Recent studies have implicated the *CADM2* gene in impulsivity and traits associated with  
389 reward sensitivity and multiple domains of human health. We confirmed numerous previously  
390 reported associations and extended our findings of variants related to *CADM2*. *CADM2* was  
391 significantly associated with 4 out of the 9 traits that we measured in GWAS and 6 out of the 9  
392 traits that we measured in gene-based analyses. In the PheWAS, *CADM2* variants were  
393 associated with decreased risk for externalizing psychopathology, but also increased risk for  
394 internalizing psychopathology (anxiety, depression, OCD). We also observed novel associations  
395 with migraines and various allergies. Others using a similar approach with UK Biobank data  
396 have found that this enrichment of associations is higher than expected [12] compared to other  
397 genes. These results provide evidence that *CADM2* variants are associated with broad health  
398 outcomes, but whether this gene affects human health via disruptions in inhibitory control or  
399 reward systems, or whether it acts via multiple pathways [71], is still not fully understood.

400           A relatively unique feature of our study is that, to follow up on the *CADM2* loci implicated  
401 in human studies, we generated a *Cadm2* mutant mouse line and used it to perform a PheWAS-  
402 like study in mice, which we have termed a MouseWAS to emphasize its conceptual similarity to  
403 human PheWAS studies. These functional experiments provided information about the causality  
404 and directionality of effects in its reported associations. We found evidence that loss of *Cadm2*  
405 resulted in *less* risky behavior and *improved* information processing, extending on prior work in  
406 humans [4, 10, 16, 62, 69].

407           *Cadm2* expression may uniquely contribute to the different domains of impulsivity. The  
408 IGT assays preference for high risk, high reward (disadvantageous) choices vs low risk, low  
409 reward (advantageous) choices [72]. HET mice exhibited a greater preference for selecting the  
410 safe option vs their WT littermates. This finding can be contrasted with the *elevated* premature  
411 responses in the 5CSRTT seen in HET vs WT mice, reflective of motoric impulsivity. However,  
412 premature responses have also been linked to temporal discrimination, wherein mice and  
413 humans overestimating the passage of time exhibit higher premature responses [73, 74]. The  
414 preference for less risky options of HET mice in the IGT could reflect their misjudgment of time –  
415 resulting in higher premature responses – and thus avoidance of higher temporal punishment in  
416 the IGT.

417           We also observed genotype differences in performance that could be indicative of  
418 *Cadm2* function in information processing. HET mice exhibiting *better* PPI at the shortest  
419 temporal window (25 ms) supports the premise that these mice have faster processing speeds.



420 HET mice also showed small increases in hole-poking in the BPM test, which is thought to  
421 reflect exploration of an environment and information gathering. Finally, we observed that HOM  
422 mice acquired 5CSRTT faster than WT littermates. Taken together, these results suggest that  
423 *Cadm2* reduction may improve some facets of information processing.

424 Findings from the 5CSRTT provide evidence that *Cadm2* deletion improves some  
425 information processing and impulsivity outcomes, while being detrimental to others. HET mice  
426 were the most likely to commit 5CSRTT premature responses, although HOM mice were  
427 surprisingly the least likely to make premature responses. Interestingly, although not significant,  
428 there was a consistent elevation in the number of premature responses committed by the HOM  
429 mice as the stimulus duration was reduced. This could suggest that HOM mice, like HET mice,  
430 may show motoric impulsivity deficits when performing tasks that require greater attentional  
431 demand. Compared with WT, HOM mice also showed impaired accuracy performance under  
432 RSD conditions, in line with our human findings of *CADM2* association with BIS Attentional, and  
433 cognitive function by others [10]. The heterogeneity of performance outcomes in the HOM mice  
434 further supports a unique but overlapping contribution of genetics across impulsivity domains.

435 In this paper, we have translated measures from human to mice. These studies begin  
436 the process of understanding the biological basis of associations identified by GWAS. The  
437 methods for measuring impulsivity in humans and mice are fundamentally different. Despite  
438 these differences, our MouseWAS identified several measures of impulsivity that were  
439 influenced by *Cadm2*, consistent with our observations in humans. Furthermore, *CADM2* has  
440 been shown to be implicated in BMI in humans [24, 75] and energy homeostasis in mice [24];  
441 extending on this, we found novel evidence of body weight reductions in adult mutant mice.  
442 Interestingly, *Cadm2* did not have more general effects on mouse behavior; for instance, we did  
443 not observe deficits in anxiety-like behavior or general motivation, as some of the human  
444 PheWAS findings revealed. A few other measures were also inconsistent across species,  
445 particularly measures of alcohol consumption, where *CADM2* showed a role in humans [7, 13,  
446 76, 77] but not mice. Lastly, some measures identified by our human PheWAS (e.g., allergies  
447 and other medical conditions) were not examined in our MouseWAS. This approach highlights  
448 the challenges of using mouse models to further investigate the role of specific genes in  
449 behavioral traits.

450 *CADM2* encodes the immunoglobulin adhesion protein SynCAM 2, which is part of the  
451 family of synaptic adhesion molecules known as SynCAMs. Studies have shown the influence

452 of SynCAMs on synaptogenesis [78–82], axon guidance [83], and neuron myelination [84–86],  
453 processes that have direct effects on the pathology of neurodevelopmental diseases [56].  
454 *CADM2* is strongly expressed in the striatum and frontal cortex, which are core regions that  
455 regulate impulsivity [70]. We did not observe changes in spine density in the Nac, which  
456 suggests that *Cadm2* may not have a role as a postsynaptic organizer of spines in this region,  
457 or may have redundant functions that are compensated in the mutant mice by other molecules.  
458 Based on *in-silico* analyses in humans, *CADM2* expression seems to be greater at earlier  
459 stages of development (**Figure S29**); whether *Cadm2* may affect earlier stages of development  
460 (prenatal and early postnatal) that are compensated in adulthood has not been investigated in  
461 this study.

462 Several limitations of this study are worth noting. The discovery GWAS only includes  
463 male and female participants of European ancestry. While we provided exploratory analyses of  
464 top variants in other ancestries and by broken down by sex (**Supplementary Table 22**), larger  
465 sample sizes would be needed to perform GWAS separately in males and females. Our results  
466 are also biased by potential ascertainment and characteristics of the sample; the 23andMe  
467 participant population is more educated and has higher socioeconomic status and lower levels  
468 of drug use and impulsivity than the general US population [86]. Replication in additional cohorts  
469 with different characteristics is warranted. Moreover, although the traits we studied are extracted  
470 via well-established questionnaires, they are self-reported measures, which are different from  
471 behavioral phenotypes [87, 88]. Another issue is that, although we tested multiple variants in the  
472 *CADM2* loci, further conditional analyses are required to determine if this signal and previously  
473 reported associations implicating *CADM2* loci, including a large non-coding rare deletion in the  
474 first intron of *CADM2* [71], may tag the same underlying genetic effect. We are also unaware of  
475 the sequence of events, and whether there is true pleiotropy or mediation effects has not been  
476 examined. The analyses were well-powered for moderate and large effect sizes. Still, for  
477 unclear reasons, despite similar minor allele frequencies and imputation quality of the SNPs we  
478 tested across all ancestries, we identified no significant associations in the African American  
479 cohort. Finally, although our mouse studies detected some discordant cross-species effects of  
480 *Cadm2* on behavior, background strain effects [89] or subtle allelic variations (vs whole KO)  
481 may explain those differences. While some results are suggestive of additive effects, we were  
482 unable to evaluate different genetic models due to lack of sufficient sample sizes for HOM mice.  
483 Future multivariate analyses examining paths of commonality and specificity across impulsivity  
484 facets may provide further insights not herein examined.

485 In conclusion, we show that impulsivity facets are extremely polygenic, but of very high  
486 transdiagnostic significance. Genetic studies using research participants not ascertained for  
487 neuropsychiatric disorders may represent an efficient and cost-effective strategy for elucidating  
488 the genetic basis and etiology of genetically complex psychiatric diseases. Using homologous  
489 measures of impulsivity in mice and humans across three ancestral backgrounds, we provide  
490 evidence of the overarching role of *CADM2* on impulsivity, and a much broader impact on  
491 human health.

#### 492 **Data availability**

493 We will provide summary statistics for the top 10,000 SNPs upon publication (**Tables**  
494 **S22-30**). Full GWAS summary statistics will be made available through 23andMe to qualified  
495 researchers under an agreement with 23andMe that protects the privacy of the 23andMe  
496 participants. Please visit <https://research.23andme.com/collaborate/#dataset-access/> for more  
497 information and to apply to access the data.

#### 498 **Acknowledgements**

499 We would like to thank the research participants and employees of 23andMe for making  
500 this work possible. The following members of the 23andMe Research Team contributed to this  
501 study: Stella Aslibekyan, Adam Auton, Elizabeth Babalola, Robert K. Bell, Jessica Bielenberg,  
502 Katarzyna Bryc, Emily Bullis, Daniella Coker, Gabriel Cuellar Partida, Devika Dhamija,  
503 Sayantan Das, Teresa Filshtein, Kipper Fletez-Brant, Will Freyman, Karl Heilbron, Pooja M.  
504 Gandhi, Karl Heilbron, Barry Hicks, David A. Hinds, Ethan M. Jewett, Yunxuan Jiang, Katelyn  
505 Kukar, Keng-Han Lin, Maya Lowe, Jey C. McCreight, Matthew H. McIntyre, Steven J. Micheletti,  
506 Meghan E. Moreno, Joanna L. Mountain, Priyanka Nandakumar, Elizabeth S. Noblin, Jared  
507 O'Connell, Aaron A. Petrakovitz, G. David Poznik, Morgan Schumacher, Anjali J. Shastri, Janie  
508 F. Shelton, Jingchunzi Shi, Suyash Shringarpure, Vinh Tran, Joyce Y. Tung, Xin Wang, Wei  
509 Wang, Catherine H. Weldon, Peter Wilton, Alejandro Hernandez, Corinna Wong, Christophe  
510 Toukam Tchakouté.

511 We would also like to thank The Externalizing Consortium for sharing the GWAS  
512 summary statistics of externalizing. The Externalizing Consortium: Principal Investigators:  
513 Danielle M. Dick, Philipp Koellinger, K. Paige Harden, Abraham A. Palmer. Lead Analysts:  
514 Richard Karlsson Linnér, Travis T. Mallard, Peter B. Barr, Sandra Sanchez-Roige. Significant  
515 Contributors: Irwin D. Waldman. The Externalizing Consortium has been supported by the

516 National Institute on Alcohol Abuse and Alcoholism (R01AA015416 -administrative supplement),  
517 and the National Institute on Drug Abuse (R01DA050721). Additional funding for investigator  
518 effort has been provided by K02AA018755, U10AA008401, P50AA022537, as well as a  
519 European Research Council Consolidator Grant (647648 EdGe to Koellinger). The content is  
520 solely the responsibility of the authors and does not necessarily represent the official views of  
521 the above funding bodies. The Externalizing Consortium would like to thank the following groups  
522 for making the research possible: 23andMe, Add Health, Vanderbilt University Medical Center's  
523 BioVU, Collaborative Study on the Genetics of Alcoholism (COGA), the Psychiatric Genomics  
524 Consortium's Substance Use Disorders working group, UK10K Consortium, UK Biobank, and  
525 Philadelphia Neurodevelopmental Cohort.

## 526 **Disclosures**

527 MVJ, SBB, YH, SSR and AAP were supported by funds from the California Tobacco-  
528 Related Disease Research Program (TRDRP; Grant Number 28IR-0070, T29KT0526 and  
529 T32IR5226). SBB was also supported by P50DA037844, SSR was also supported by NIH/NIDA  
530 DP1DA054394. JM and SSR were supported by the Brain and Behavior Foundation (grant  
531 27676) and the Families for Borderline Personality Disorder Research (Beth and Rob Elliott)  
532 2018 NARSAD Young Investigator Grant. The content is solely the responsibility of the authors  
533 and does not necessarily represent the official views of the National Institutes of Health. SAB  
534 was supported by NIH/NIMH grants R01MH108653 and R21MH117518. AMBL was supported  
535 by NIH/NIAAA grant K99AA027835. TB acknowledges support by NIH/NIDA R01 DA018928.  
536 JM is supported by the Peter Boris Chair in Addictions Research. HHAT is funded through a  
537 Natural Science and Engineering Research Council PGS-D scholarship, and studies in Cohort 2  
538 were supported by the Canadian Institutes of Health Research Project Grant (PJT-173442 to  
539 JYK).

540 PF and SLE are employees of 23andMe, Inc., and hold stock or stock options in  
541 23andMe. JY reports having received grant support funding from Sunovion, Heptares, and  
542 Gilgamesh, as well as honoraria from Marvel Biotech, none of which were involved in the  
543 current project. The other authors report no conflict of interest.

544

## 545 REFERENCES

- 546
- 547 1. Daruna JH, Barnes PA. A neurodevelopmental view of impulsivity. *Impuls. Client Theory*  
548 *Res. Treat.*, Washington, D.C.: American Psychological Association; 1993. p. 23.
  - 549 2. Coskunpinar A, Dir AL, Cyders MA. Multidimensionality in Impulsivity and Alcohol Use: A  
550 Meta-Analysis Using the UPPS Model of Impulsivity. *Alcohol Clin Exp Res.*  
551 2013;37:1441–1450.
  - 552 3. Jackson JNS, MacKillop J. Attention-Deficit/Hyperactivity Disorder and Monetary Delay  
553 Discounting: A Meta-Analysis of Case-Control Studies. *Biol Psychiatry Cogn Neurosci*  
554 *Neuroimaging.* 2016;1:316–325.
  - 555 4. Sanchez-Roige S, Fontanillas P, Elson SL, Gray JC, de Wit H, MacKillop J, et al.  
556 Genome-wide association studies of impulsive personality traits (BIS-11 and UPPSP) and  
557 drug experimentation in up to 22,861 adult research participants identify loci in the  
558 *CACNA1I* and *CADM2* genes. *J Neurosci.* 2019:2662–18.
  - 559 5. Gustavson DE, Friedman NP, Fontanillas P, Elson SL. The Latent Genetic Structure of  
560 Impulsivity and Its Relation to Internalizing Psychopathology:11.
  - 561 6. Insel TR. The NIMH Research Domain Criteria (RDoC) Project: Precision Medicine for  
562 Psychiatry. *Am J Psychiatry.* 2014;171:395–397.
  - 563 7. Arends RM, Pasman JA, Verweij KJH, Derks EM, Gordon SD, Hickie I, et al. Associations  
564 between the *CADM2* gene, substance use, risky sexual behavior, and self-control: A  
565 phenome-wide association study:13.
  - 566 8. Boutwell B, Hinds D, Tielbeek J, Ong KK, Day FR, Perry JRB, et al. Replication and  
567 characterization of *CADM2* and *MSRA* genes on human behavior. *Heliyon.*  
568 2017;3:e00349.
  - 569 9. 23andMe Research Team, COGENT (Cognitive Genomics Consortium), Social Science  
570 Genetic Association Consortium, Lee JJ, Wedow R, Okbay A, et al. Gene discovery and  
571 polygenic prediction from a genome-wide association study of educational attainment in  
572 1.1 million individuals. *Nat Genet.* 2018;50:1112–1121.
  - 573 10. on behalf of Generation Scotland, Ibrahim-Verbaas CA, Bressler J, Debette S, Schuur M,  
574 Smith AV, et al. GWAS for executive function and processing speed suggests  
575 involvement of the *CADM2* gene. *Mol Psychiatry.* 2016;21:189–197.
  - 576 11. Strawbridge RJ, Ward J, Cullen B, Tunbridge EM, Hartz S, Bierut L, et al. Genome-wide  
577 analysis of self-reported risk-taking behaviour and cross-disorder genetic correlations in  
578 the UK Biobank cohort. *Transl Psychiatry.* 2018;8:39.
  - 579 12. A. Pasman J, Chen Z, Vink JM, Van Den Oever MC, Pattij T, Vries TJD, et al. The  
580 *CADM2* gene and behavior: A phenome-wide scan in UK-Biobank. *Genetic and Genomic*  
581 *Medicine;* 2021.
  - 582 13. Sanchez-Roige S, Palmer AA, Fontanillas P, Elson SL, the 23andMe Research Team,  
583 the Substance Use Disorder Working Group of the Psychiatric Genomics Consortium,  
584 Adams MJ, et al. Genome-Wide Association Study Meta-Analysis of the Alcohol Use  
585 Disorders Identification Test (AUDIT) in Two Population-Based Cohorts. *Am J Psychiatry.*  
586 2019;176:107–118.
  - 587 14. the 23andMe Research Team, The Substance Use Disorders Working Group of the  
588 Psychiatric Genomics Consortium, International Cannabis Consortium, Pasman JA,  
589 Verweij KJH, Gerring Z, et al. GWAS of lifetime cannabis use reveals new risk loci,  
590 genetic overlap with psychiatric traits, and a causal effect of schizophrenia liability. *Nat*  
591 *Neurosci.* 2018;21:1161–1170.
  - 592 15. 23and Me Research Team, eQTLgen Consortium, International Cannabis Consortium,  
593 Social Science Genetic Association Consortium, Karlsson Linnér R, Biroli P, et al.  
594 Genome-wide association analyses of risk tolerance and risky behaviors in over 1 million



- 595 individuals identify hundreds of loci and shared genetic influences. *Nat Genet.*  
596 2019;51:245–257.
- 597 16. Linnér RK. Multivariate analysis of 1.5 million people identifies genetic associations with  
598 traits related to self-regulation and addiction. *Nat Neurosci.* 2021;24:27.
- 599 17. Casey JP, Magalhaes T, Conroy JM, Regan R, Shah N, Anney R, et al. A novel approach  
600 of homozygous haplotype sharing identifies candidate genes in autism spectrum disorder.  
601 *Hum Genet.* 2012;131:565–579.
- 602 18. ADHD Working Group of the Psychiatric Genomics Consortium (PGC), Early Lifecourse &  
603 Genetic Epidemiology (EAGLE) Consortium, 23andMe Research Team, Demontis D,  
604 Walters RK, Martin J, et al. Discovery of the first genome-wide significant risk loci for  
605 attention deficit/hyperactivity disorder. *Nat Genet.* 2019;51:63–75.
- 606 19. Klimentidis YC, Raichlen DA, Bea J, Garcia DO, Wineinger NE, Mandarin LJ, et al.  
607 Genome-wide association study of habitual physical activity in over 377,000 UK Biobank  
608 participants identifies multiple variants including *CADM2* and *APOE*. *Int J Obes.*  
609 2018;42:1161–1176.
- 610 20. Day FR, Helgason H, Chasman DI, Rose LM, Loh P-R, Scott RA, et al. Physical and  
611 neurobehavioral determinants of reproductive onset and success. *Nat Genet.*  
612 2016;48:617–623.
- 613 21. Mills MC, Tropf FC, Brazel DM, van Zuydam N, Vaez A, eQTLGen Consortium, et al.  
614 Identification of 371 genetic variants for age at first sex and birth linked to externalising  
615 behaviour. *Nat Hum Behav.* 2021;5:1717–1730.
- 616 22. The LifeLines Cohort Study, The ADIPOGen Consortium, The AGEN-BMI Working  
617 Group, The CARDIOGRAMplusC4D Consortium, The CKDGen Consortium, The GLGC,  
618 et al. Genetic studies of body mass index yield new insights for obesity biology. *Nature.*  
619 2015;518:197–206.
- 620 23. Justice AE, Winkler TW, Feitosa MF, Graff M, Fisher VA, Young K, et al. Genome-wide  
621 meta-analysis of 241,258 adults accounting for smoking behaviour identifies novel loci for  
622 obesity traits. *Nat Commun.* 2017;8:14977.
- 623 24. Yan X, Wang Z, Schmidt V, Gauert A, Willnow TE, Heinig M, et al. *Cadm2* regulates body  
624 weight and energy homeostasis in mice. *Mol Metab.* 2018;8:180–188.
- 625 25. Sanchez-Roige S, Fontanillas P, Jennings MV, Bianchi S, Huang Y, Hatoum A, et al.  
626 Genome-wide association study of problematic opioid prescription use in 132,113  
627 23andMe research participants of European ancestry. *Psychiatry and Clinical*  
628 *Psychology*; 2021.
- 629 26. Sanchez-Roige S, Fontanillas P, Elson SL, the 23andme research team, Pandit A,  
630 Schmidt EM, et al. Genome-wide association study of delay discounting in 23,217 adult  
631 research participants of European ancestry. *Nat Neurosci.* 2018;21:16–18.
- 632 27. Cyders MA, Littlefield AK, Coffey S, Karyadi KA. Examination of a short English version of  
633 the UPPS-P Impulsive Behavior Scale. *Addict Behav.* 2014;39:1372–1376.
- 634 28. Whiteside SP, Lynam DR. The Five Factor Model and impulsivity: using a structural  
635 model of personality to understand impulsivity. *Personal Individ Differ.* 2001;30:669–689.
- 636 29. Patton JH, Stanford MS, Barratt ES. Factor structure of the barratt impulsiveness scale.  
637 *Wiley Period Inc.* 1995;51:768–774.
- 638 30. VanderBroek L, Acker J, Palmer AA, de Wit H, MacKillop J. Interrelationships among  
639 parental family history of substance misuse, delay discounting, and personal substance  
640 use. *Psychopharmacology (Berl).* 2016;233:39–48.
- 641 31. Durand EY, Do CB, Mountain JL, Macpherson JM. Ancestry Composition: A Novel,  
642 Efficient Pipeline for Ancestry Deconvolution:16.
- 643 32. Eriksson N, Macpherson JM, Tung JY, Hon LS, Naughton B, Saxonov S, et al. Web-  
644 Based, Participant-Driven Studies Yield Novel Genetic Associations for Common Traits.  
645 *PLoS Genet.* 2010;6:e1000993.

- 646 33. Hyde CL, Nagle MW, Tian C, Chen X, Paciga SA, Wendland JR, et al. Identification of 15  
647 genetic loci associated with risk of major depression in individuals of European descent.  
648 *Nat Genet.* 2016;48:1031–1036.
- 649 34. Watanabe K, Taskesen E, van Bochoven A, Posthuma D. Functional mapping and  
650 annotation of genetic associations with FUMA. *Nat Commun.* 2017;8:1826.
- 651 35. Leeuw CA de, Mooij JM, Heskes T, Posthuma D. MAGMA: Generalized Gene-Set  
652 Analysis of GWAS Data. *PLOS Comput Biol.* 2015;11:e1004219.
- 653 36. Bulik-Sullivan BK, Loh P-R, Finucane HK, Ripke S, Yang J, Patterson N, et al. LD Score  
654 regression distinguishes confounding from polygenicity in genome-wide association  
655 studies. *Nat Genet.* 2015;47:291–295.
- 656 37. Verma A, Bradford Y, Dudek S, Lucas AM, Verma SS, Pendergrass SA, et al. A  
657 simulation study investigating power estimates in phenome-wide association studies.  
658 *BMC Bioinformatics.* 2018;19:120.
- 659 38. Ehm MG, Aponte JL, Chiano MN, Yerges-Armstrong LM, Johnson T, Barker JN, et al.  
660 Phenome-wide association study using research participants' self-reported data provides  
661 insight into the Th17 and IL-17 pathway. *PLOS ONE.* 2017;12:e0186405.
- 662 39. Lloyd KCK. A knockout mouse resource for the biomedical research community: The  
663 KOMP Repository. *Ann N Y Acad Sci.* 2011;1245:24–26.
- 664 40. Evangelou E, Gao H, Chu C, Ntritsos G, Blakeley P, Butts AR, et al. New alcohol-related  
665 genes suggest shared genetic mechanisms with neuropsychiatric disorders. *Nat Hum  
666 Behav.* 2019;3:950–961.
- 667 41. Ikeda M, Takahashi A, Kamatani Y, Momozawa Y, Saito T, Kondo K, et al. Genome-Wide  
668 Association Study Detected Novel Susceptibility Genes for Schizophrenia and Shared  
669 Trans-Populations/Diseases Genetic Effect. *Schizophr Bull.* 2019;45:824–834.
- 670 42. 23andMe Research Team, Major Depressive Disorder Working Group of the Psychiatric  
671 Genomics Consortium, Howard DM, Adams MJ, Clarke T-K, Hafferty JD, et al. Genome-  
672 wide meta-analysis of depression identifies 102 independent variants and highlights the  
673 importance of the prefrontal brain regions. *Nat Neurosci.* 2019;22:343–352.
- 674 43. Yang H, Liu D, Zhao C, Feng B, Lu W, Yang X, et al. Mendelian randomization integrating  
675 GWAS and eQTL data revealed genes pleiotropically associated with major depressive  
676 disorder. *Transl Psychiatry.* 2021;11:225.
- 677 44. BIOS consortium, Social Science Genetic Association Consortium, Baselmans BML,  
678 Jansen R, Ip HF, van Dongen J, et al. Multivariate genome-wide analyses of the well-  
679 being spectrum. *Nat Genet.* 2019;51:445–451.
- 680 45. Hill WD, Weiss A, Liewald DC, Davies G, Porteous DJ, Hayward C, et al. Genetic  
681 contributions to two special factors of neuroticism are associated with affluence, higher  
682 intelligence, better health, and longer life. *Mol Psychiatry.* 2020;25:3034–3052.
- 683 46. Teixeira JR, Szeto RA, Carvalho VMA, Muotri AR, Papes F. Transcription factor 4 and its  
684 association with psychiatric disorders. *Transl Psychiatry.* 2021;11:19.
- 685 47. Van Esch H, Colnaghi R, Freson K, Starokadomskyy P, Zankl A, Backx L, et al. Defective  
686 DNA Polymerase  $\alpha$ -Primase Leads to X-Linked Intellectual Disability Associated with  
687 Severe Growth Retardation, Microcephaly, and Hypogonadism. *Am J Hum Genet.*  
688 2019;104:957–967.
- 689 48. Christakoudi S, Evangelou E, Riboli E, Tsilidis KK. GWAS of allometric body-shape  
690 indices in UK Biobank identifies loci suggesting associations with morphogenesis,  
691 organogenesis, adrenal cell renewal and cancer. *Sci Rep.* 2021;11:10688.
- 692 49. Pulit SL, Stoneman C, Morris AP, Wood AR, Glastonbury CA, Tyrrell J, et al. Meta-  
693 analysis of genome-wide association studies for body fat distribution in 694 649  
694 individuals of European ancestry. *Hum Mol Genet.* 2019;28:166–174.
- 695 50. Nagel M, Watanabe K, Stringer S, Posthuma D, van der Sluis S. Item-level analyses  
696 reveal genetic heterogeneity in neuroticism. *Nat Commun.* 2018;9:905.

- 697 51. Lo M-T, Hinds DA, Tung JY, Franz C, Fan C-C, Wang Y, et al. Genome-wide analyses for  
698 personality traits identify six genomic loci and show correlations with psychiatric  
699 disorders. *Nat Genet.* 2017;49:152–156.
- 700 52. 23andMe Research Team, Thorp JG, Campos AI, Grotzinger AD, Gerring ZF, An J, et al.  
701 Symptom-level modelling unravels the shared genetic architecture of anxiety and  
702 depression. *Nat Hum Behav.* 2021. 15 April 2021. [https://doi.org/10.1038/s41562-021-](https://doi.org/10.1038/s41562-021-01094-9)  
703 01094-9.
- 704 53. Feitosa MF, Kraja AT, Chasman DI, Sung YJ, Winkler TW, Ntalla I, et al. Novel genetic  
705 associations for blood pressure identified via gene-alcohol interaction in up to 570K  
706 individuals across multiple ancestries. *PLOS ONE.* 2018;13:e0198166.
- 707 54. The Endometrial Cancer Association Consortium, Ruth KS, Day FR, Tyrrell J, Thompson  
708 DJ, Wood AR, et al. Using human genetics to understand the disease impacts of  
709 testosterone in men and women. *Nat Med.* 2020;26:252–258.
- 710 55. Rask-Andersen M, Karlsson T, Ek WE, Johansson Å. Genome-wide association study of  
711 body fat distribution identifies adiposity loci and sex-specific genetic effects. *Nat*  
712 *Commun.* 2019;10:339.
- 713 56. Hill WD, Davies NM, Ritchie SJ, Skene NG, Bryois J, Bell S, et al. Genome-wide analysis  
714 identifies molecular systems and 149 genetic loci associated with income. *Nat Commun.*  
715 2019;10:5741.
- 716 57. Alzheimer’s Disease Neuroimaging Initiative, Pediatric Imaging, Neurocognition and  
717 Genetics, Zhao B, Luo T, Li T, Li Y, et al. Genome-wide association analysis of 19,629  
718 individuals identifies variants influencing regional brain volumes and refines their genetic  
719 co-architecture with cognitive and mental health traits. *Nat Genet.* 2019;51:1637–1644.
- 720 58. Gaddis N, Mathur R, Marks J, Zhou L, Quach B, Waldrop A, et al. Multi-trait genome-wide  
721 association study of opioid addiction: *OPRM1* and Beyond. *Addiction Medicine*; 2021.
- 722 59. Liu M, Jiang Y, Wedow R, Li Y, Brazel DM, Chen F, et al. Association studies of up to 1.2  
723 million individuals yield new insights into the genetic etiology of tobacco and alcohol use.  
724 *Nat Genet.* 2019;51:237–244.
- 725 60. Davies G, Lam M, Harris SE, Trampush JW, Luciano M, Hill WD, et al. Study of 300,486  
726 individuals identifies 148 independent genetic loci influencing general cognitive function.  
727 *Nat Commun.* 2018;9:2098.
- 728 61. ADHD Working Group of the Psychiatric Genomics Consortium, 23andMe Research  
729 team, Rovira P, Demontis D, Sánchez-Mora C, Zayats T, et al. Shared genetic  
730 background between children and adults with attention deficit/hyperactivity disorder.  
731 *Neuropsychopharmacology.* 2020;45:1617–1626.
- 732 62. Karlsson Linnér R, Biroli P, Kong E, Meddens SFW, Wedow R, Fontana MA, et al.  
733 Genome-wide association analyses of risk tolerance and risky behaviors in over 1 million  
734 individuals identify hundreds of loci and shared genetic influences. *Nat Genet.*  
735 2019;51:245–257.
- 736 63. Pritikin JN, Neale MC, Prom-Wormley EC, Clark SL, Verhulst B. GW-SEM 2.0: Efficient,  
737 Flexible, and Accessible Multivariate GWAS. *Behav Genet.* 2021;51:343–357.
- 738 64. MacKillop J, Weafer J, C. Gray J, Oshri A, Palmer A, de Wit H. The latent structure of  
739 impulsivity: impulsive choice, impulsive action, and impulsive personality traits.  
740 *Psychopharmacology (Berl).* 2016;233:3361–3370.
- 741 65. Gray JC, MacKillop J, Weafer J, Hernandez KM, Gao J, Palmer AA, et al. Genetic  
742 analysis of impulsive personality traits: Examination of a priori candidates and genome-  
743 wide variation. *Psychiatry Res.* 2018;259:398–404.
- 744 66. Leppert B, Millard LAC, Riglin L, Davey Smith G, Thapar A, Tilling K, et al. A cross-  
745 disorder PRS-pheWAS of 5 major psychiatric disorders in UK Biobank. *PLOS Genet.*  
746 2020;16:e1008185.



- 747 67. Metha JA, Brian ML, Oberrauch S, Barnes SA, Featherby TJ, Bossaerts P, et al.  
748 Separating Probability and Reversal Learning in a Novel Probabilistic Reversal Learning  
749 Task for Mice. *Front Behav Neurosci.* 2020;13:270.
- 750 68. Mota NR, Araujo-Jnr EV, Paixão-Côrtes VR, Bortolini MC, Bau CHD. Linking dopamine  
751 neurotransmission and neurogenesis: the evolutionary history of the NTAD (NCAM1-  
752 TTC12-ANKK1-DRD2) gene cluster. *Genet Mol Biol.* 2012;35:912–918.
- 753 69. Greenbaum L, Ravona-Springer R, Livny A, Shelly S, Ganmore I, Alkelai A, et al. The  
754 CADM2 gene is associated with processing speed performance – evidence among  
755 elderly with type 2:8.
- 756 70. Dalley JW, Everitt BJ, Robbins TW. Impulsivity, Compulsivity, and Top-Down Cognitive  
757 Control. *Neuron.* 2011;69:680–694.
- 758 71. Collins RL, Glessner JT, Porcu E, Niestroj L-M, Ulirsch J, Kellaris G, et al. A cross-  
759 disorder dosage sensitivity map of the human genome. *Genetic and Genomic Medicine;*  
760 2021.
- 761 72. van Enkhuizen J, Henry BL, Minassian A, Perry W, Milienne-Petiot M, Higa KK, et al.  
762 Reduced Dopamine Transporter Functioning Induces High-Reward Risk-Preference  
763 Consistent with Bipolar Disorder. *Neuropsychopharmacology.* 2014;39:3112–3122.
- 764 73. Cope ZA, Halberstadt AL, van Enkhuizen J, Flynn AD, Breier M, Swerdlow NR, et al.  
765 Premature responses in the five-choice serial reaction time task reflect rodents' temporal  
766 strategies: evidence from no-light and pharmacological challenges. *Psychopharmacology*  
767 (Berl). 2016;233:3513–3525.
- 768 74. Hsu T-Y, Lee H-C, Lane TJ, Missal M. Temporal Preparation, Impulsivity and Short-Term  
769 Memory in Depression. *Front Behav Neurosci.* 2019;13:258.
- 770 75. Morris J. Genetic variation in CADM2 as a link between psychological traits and  
771 obesity:14.
- 772 76. Clarke T-K, Adams M, Davies G, Howard D, Hall L, Padmanabhan S, et al. Genome-wide  
773 association study of alcohol consumption and genetic overlap with other health-related  
774 traits in UK Biobank. *Mol Psychiatry.* 2017:9.
- 775 77. Kranzler HR, Zhou H, Kember RL, Smith RV, Justice AC, Damrauer S, et al. Genome-  
776 wide association study of alcohol consumption and use disorder in 274,424 individuals  
777 from multiple populations. *Nat Commun.* 2019;10:1499.
- 778 78. Giza JI, Jung Y, Jeffrey RA, Neugebauer NM, Picciotto MR, Biederer T. The Synaptic  
779 Adhesion Molecule SynCAM 1 Contributes to Cocaine Effects on Synapse Structure and  
780 Psychostimulant Behavior. *Neuropsychopharmacology.* 2013;38:628–638.
- 781 79. Biederer T, Sara Y, Mozhayeva M, Atasoy D, Liu X, Kavalali ET, et al. SynCAM, a  
782 Synaptic Adhesion Molecule That Drives Synapse Assembly. *Science.* 2002;297:1525–  
783 1531.
- 784 80. Fogel AI, Akins MR, Krupp AJ, Stagi M, Stein V, Biederer T. SynCAMs Organize  
785 Synapses through Heterophilic Adhesion. *J Neurosci.* 2007;27:12516–12530.
- 786 81. Robbins EM, Krupp AJ, Perez de Arce K, Ghosh AK, Fogel AI, Boucard A, et al. SynCAM  
787 1 Adhesion Dynamically Regulates Synapse Number and Impacts Plasticity and  
788 Learning. *Neuron.* 2010;68:894–906.
- 789 82. Yamada A, Inoue E, Deguchi-Tawarada M, Matsui C, Togawa A, Nakatani T, et al. Nectin-  
790 2/CADM1 interacts with ErbB4 and regulates its activity in GABAergic neurons. *Mol Cell*  
791 *Neurosci.* 2013;56:234–243.
- 792 83. Niederkofler V, Baeriswyl T, Ott R, Stoekli ET. Nectin-like molecules/SynCAMs are  
793 required for post-crossing commissural axon guidance. *Development.* 2010;137:427–435.
- 794 84. Maurel P, Einheber S, Galinska J, Thaker P, Lam I, Rubin MB, et al. Nectin-like proteins  
795 mediate axon–Schwann cell interactions along the internode and are essential for  
796 myelination. *J Cell Biol.* 2007;178:861–874.

- 797 85. Spiegel I, Adamsky K, Eshed Y, Milo R, Sabanay H, Sarig-Nadir O, et al. A central role  
798 for Necl4 (SynCAM4) in Schwann cell–axon interaction and myelination. *Nat Neurosci.*  
799 2007;10:861–869.
- 800 86. Park J, Liu B, Chen T, Li H, Hu X, Gao J, et al. Disruption of Nectin-Like 1 Cell Adhesion  
801 Molecule Leads to Delayed Axonal Myelination in the CNS. *J Neurosci.* 2008;28:12815–  
802 12819.
- 803 87. Enticott PG, Ogloff JRP, Bradshaw JL. Associations between laboratory measures of  
804 executive inhibitory control and self-reported impulsivity. *Personal Individ Differences.*  
805 2006;10.
- 806 88. Lane SD, Cherek DR, Rhoades HM, Pietras CJ, Tcheremissine OV. Relationships  
807 Among Laboratory and Psychometric Measures of Impulsivity: Implications in Substance  
808 Abuse and Dependence:8.
- 809 89. Sittig LJ, Carbonetto P, Engel KA, Krauss KS, Barrios-Camacho CM, Palmer AA. Genetic  
810 Background Limits Generalizability of Genotype-Phenotype Relationships. *Neuron.*  
811 2016;91:1253–1259.
- 812
- 813

## Figure Legends

**Figure 1.** Porcupine plot displaying 21 genome-wide significant hits for all impulsivity facets and Drug Experimentation. *CADM2* was consistent across 3/8 impulsivity facets [Sensation Seeking (UPPS-P), Motor and Nonplanning impulsivity (BIS-11)] at a genome-wide association level, and with 3 more impulsivity facets [Attentional (BIS-11), Negative Urgency and Premeditation (UPPS-P)], at a gene-based level (**Table S8**). *CADM2* was also associated with risky behavior, such as Drug Experimentation.

**Figure 2.** Genetic correlations ( $r_g$ ) between UPPS-P, BIS, and Drug Experimentation, and other substance use, psychiatric, personality, cognitive, metabolic, health, pain, longevity and sleep traits (see **Table S9** for full results). All values survive 5% FDR correction.

**Figure 3.** FDR-significant associations from *CADM2* single-SNP PheWAS in individuals of European ancestry (**A**) and Latin American ancestry (**B**). Results for the SNP with the highest number of significant PheWAS associations (rs993137) are presented; results for additional SNPs are included in Supplementary Tables 15-17. No FDR-significant findings were detected in individuals of African American ancestry. The size of the dots represents the magnitude of the effect size for each trait. The effect sizes ranged from -0.14 to 0.13 in the European cohort and from -0.08 to 0.16 in the Latin American cohort. Dotted line denotes Bonferroni significance ( $p < 3.79E-05$ ).

**Figure 4.** MouseWAS examined the complete and partial loss of *Cadm2* function and behavioral consequences in the Probability Breakpoint Ratio Task (PBRT, **A**), Probabilistic Reversal Learning Task (PRLT, **B**), Iowa gambling task (IGT, **C-D**), Behavioral Pattern Monitor task (BPM, **E-F**), Prepulse Inhibition (PPI, **G-H**), 5-Choice Serial Reaction Time Task (5CSRTT) performance (**I-M**), Locomotor (LCM) activity (**N**), Elevated Plus Maze (EPM, **O**), Light-Dark Box (LDB, **P**), and Drinking in the Dark (DID, **Q**); longitudinal body weight changes (**R**), and dendrite morphology (DSM) in the nucleus accumbens (**S**). Western blot (**WB**) analysis (**T**) of *Cadm2* protein in whole brain, frontal cortex and striatum. WT, wildtype, HET, heterozygote, HOM, homozygote. Sample size by cohort: cohort 1 (WT=25, HET=30, HOM=3), cohort 2 (WT=13; HET=14, HOM=12), cohort 3 (WT=22; HET=44, HOM=12), cohort 4 (WT=29, HT=54, HOM=17), cohort 5 (WT=3, HET=3, HOM=3). In cohort 1, the sample size of the HOM mice deviated from the expected Mendelian frequency for unknown reasons; these animals were excluded from the analyses. Males are represented in circles, females in triangles. \*  $p < 0.05$ , \*\*  $p < 0.01$ , \*\*\*  $p < 0.001$ .



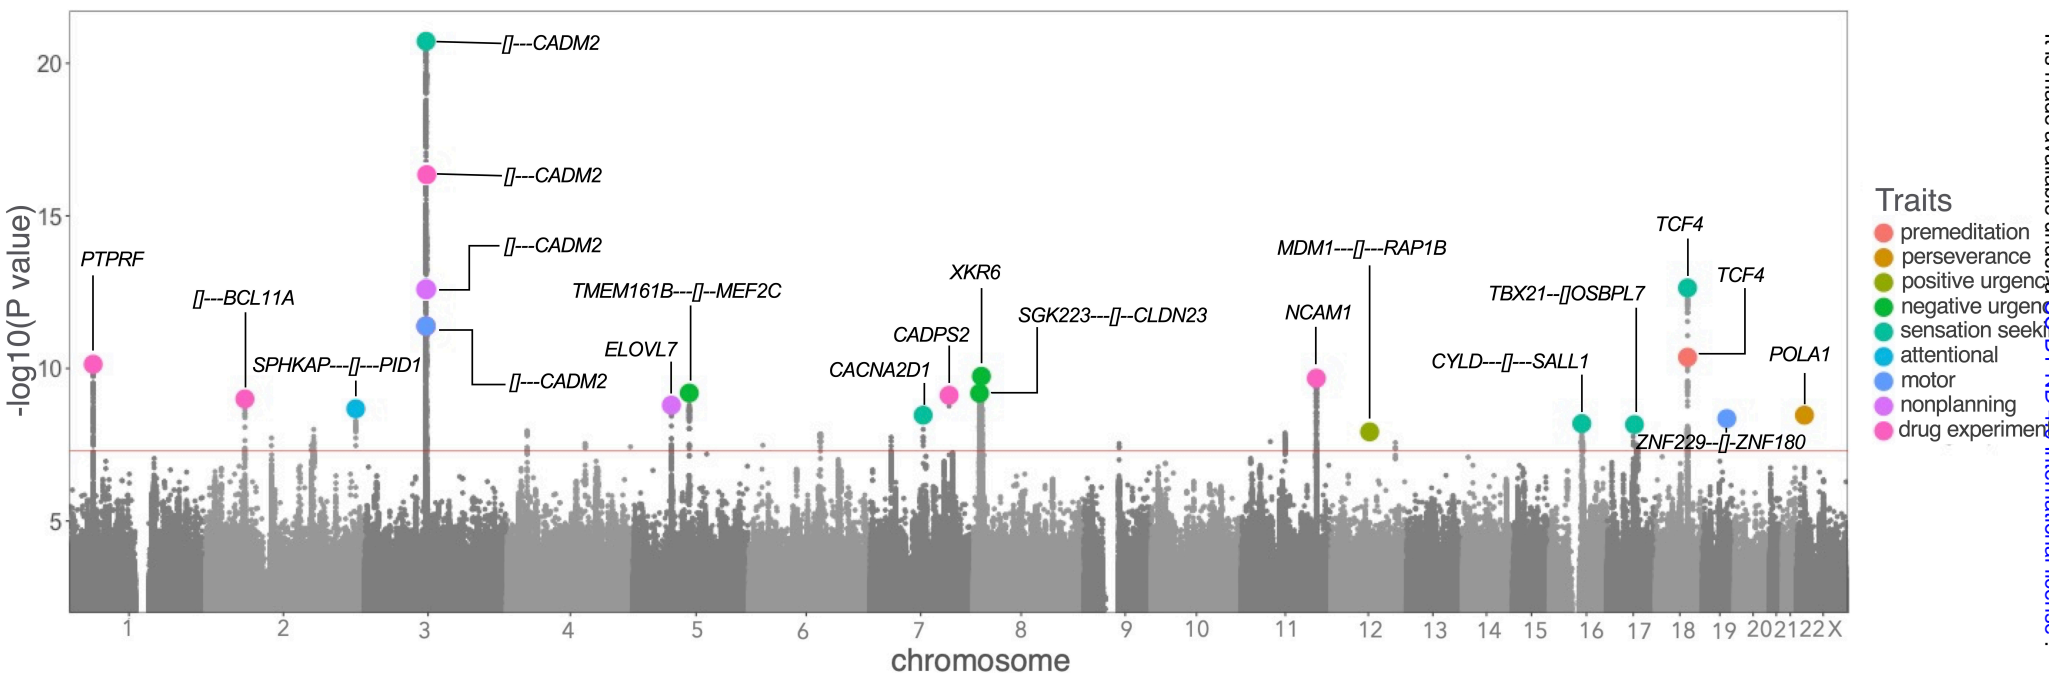

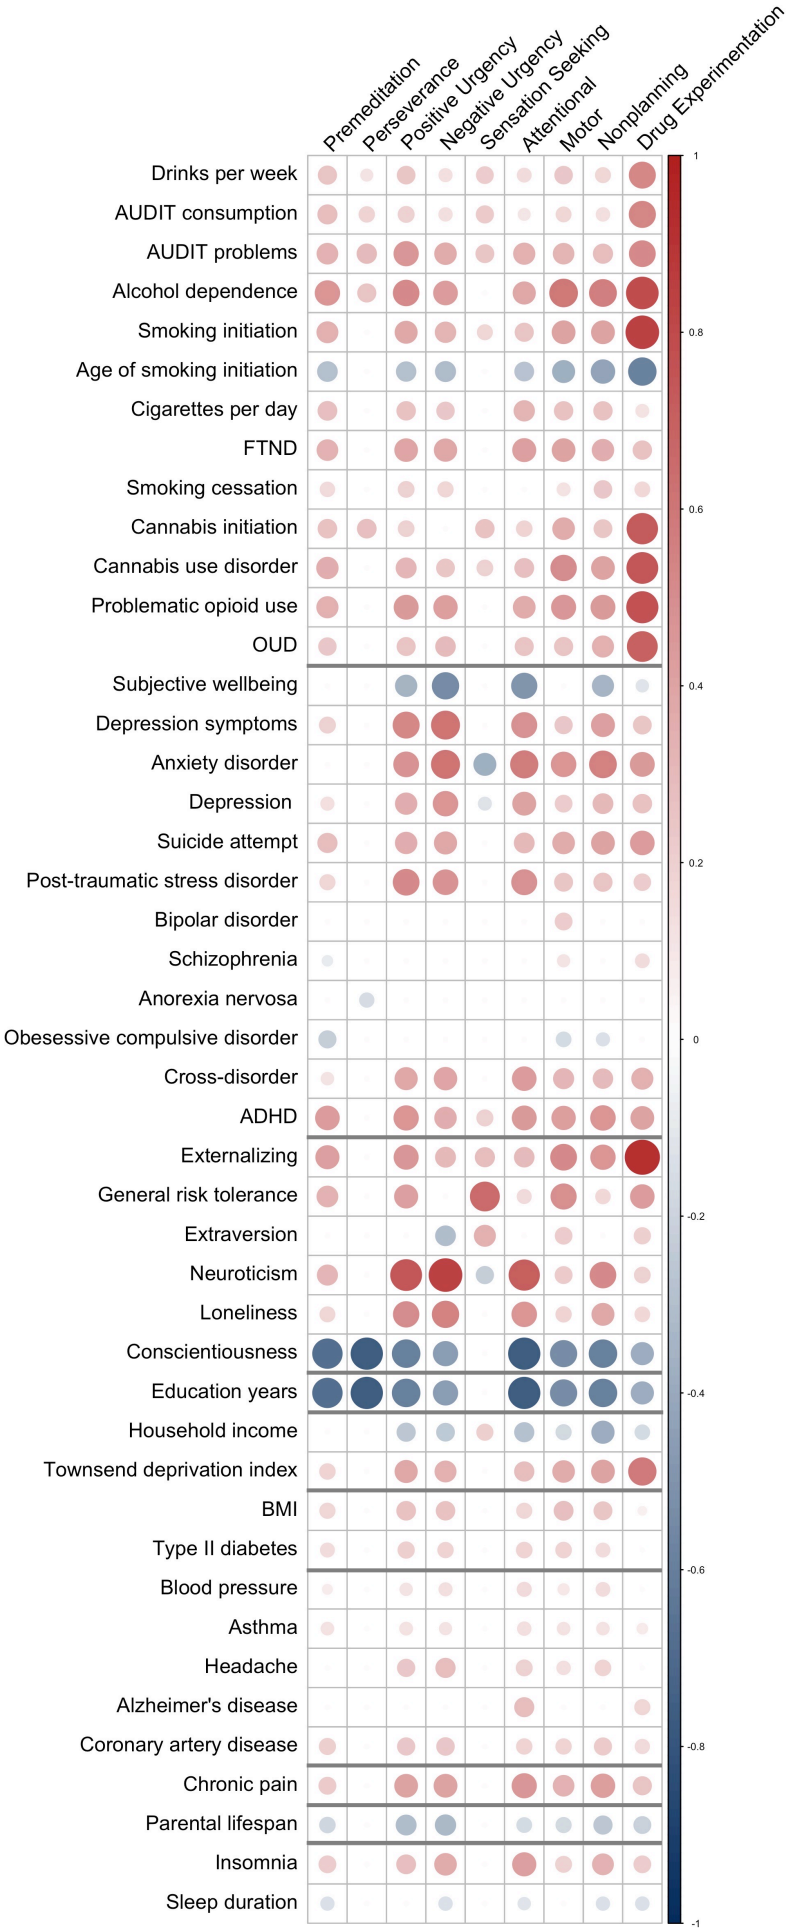



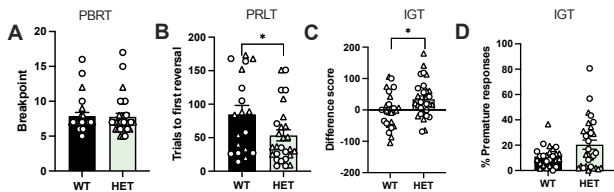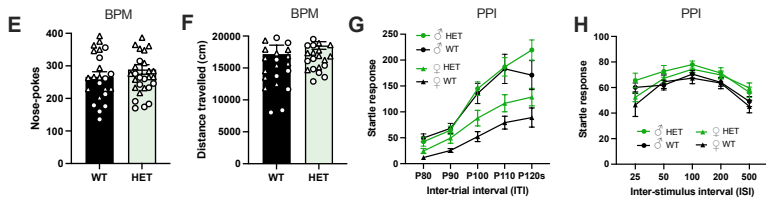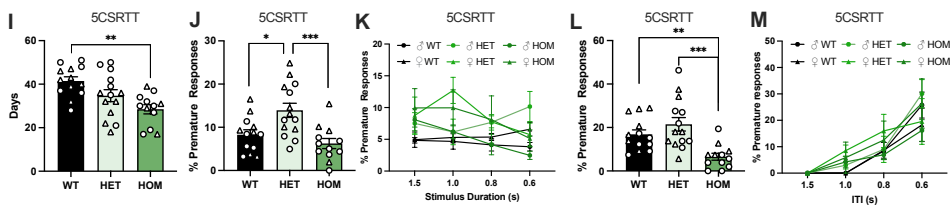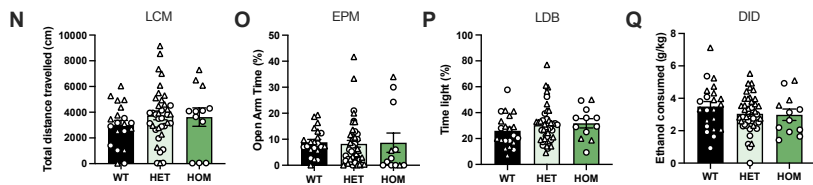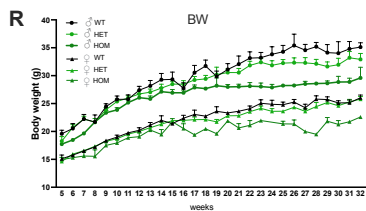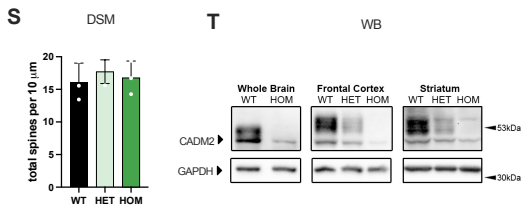

Source: https://medrxiv.org/content/medrxiv/early/2023/03/16/2022.01.29.22270095.full.pdf
